# Supplementary material for: Advanced fibrosis leads to overestimation of steatosis with quantitative ultrasound in individuals without hepatic steatosis
Source: PubMed Central journal article supplement — Ultrasonography. 2023 Dec 11;43(2):121–31. doi: 10.14366/usg.23194 (PMC10915114; doi:10.14366/usg.23194), 2023-12-11
Supplement: usg-23194-Supplementary-Table-1.pdf [file usg-23194-Supplementary-Table-1.pdf]

**Supplementary Table 1.** Intrarater and interrater reliability of the US attenuation parameter

| Operator                                                                        | ICC    | 95% Confidence interval |
|---------------------------------------------------------------------------------|--------|-------------------------|
| Intrarater reliability of the US attenuation parameter by 4 operators (n=14)    |        |                         |
| 1                                                                               | 0.9900 | 0.9786–0.9963           |
| 2                                                                               | 0.9951 | 0.9892–0.9983           |
| 3                                                                               | 0.9973 | 0.9952–0.9987           |
| 4                                                                               | 0.9942 | 0.9929–0.9953           |
| Interrater reliability of the US attenuation parameter among 4 operators (n=14) |        |                         |
| 4 operators                                                                     | 0.9484 | 0.8848–0.9814           |

US, ultrasound; ICC, intraclass correlation coefficient.

**Supplementary Table 2.** Multiple comparison using the Steel-Dwass test among groups A, B, and C, which showed significant differences by the Kruskal-Wallis test in Table 2

| Parameter                            | P-value             |                     |                     |
|--------------------------------------|---------------------|---------------------|---------------------|
|                                      | Group A vs. group B | Group A vs. group C | Group B vs. group C |
| Body mass index (kg/m <sup>2</sup> ) | 0.778               | 0.227               | P<0.001             |
| SCD (mm)                             | 0.072               | 0.777               | 0.074               |
| ALT (U/L)                            | 0.894               | 0.103               | 0.003               |
| Platelet count (10 <sup>4</sup> /μL) | 0.993               | 0.184               | 0.004               |
| FIB-4 score                          | 0.808               | 0.166               | 0.017               |
| Albumin (g/dL)                       | 0.696               | 0.104               | <0.001              |
| ALBI score                           | 0.701               | 0.029               | 0.001               |
| USAP value (dB/cm/MHz)               | 0.003               | 0.209               | 0.006               |
| MRI-derived PDFF (%)                 | <0.001              | <0.001              | 0.001               |
| MR elastography value (kPa)          | 0.289               | 0.019               | 0.027               |

Group A (n=16), high MRI-derived PDFF values and low UGAP values. Group B (n=930), concordant MRI-derived PDFF and UGAP values. Group C (n=36), low MRI-derived PDFF and high UGAP values.

SCD, skin capsular distance; ALT, alanine aminotransferase; FIB-4, fibrosis-4; ALBI, albumin-bilirubin; USAP, ultrasound attenuation parameter; MRI, magnetic resonance imaging; PDFF, proton density fat fraction; MR, magnetic resonance
